# Supplementary material
Source: PubMed Central journal article supplement (PMC3023215)

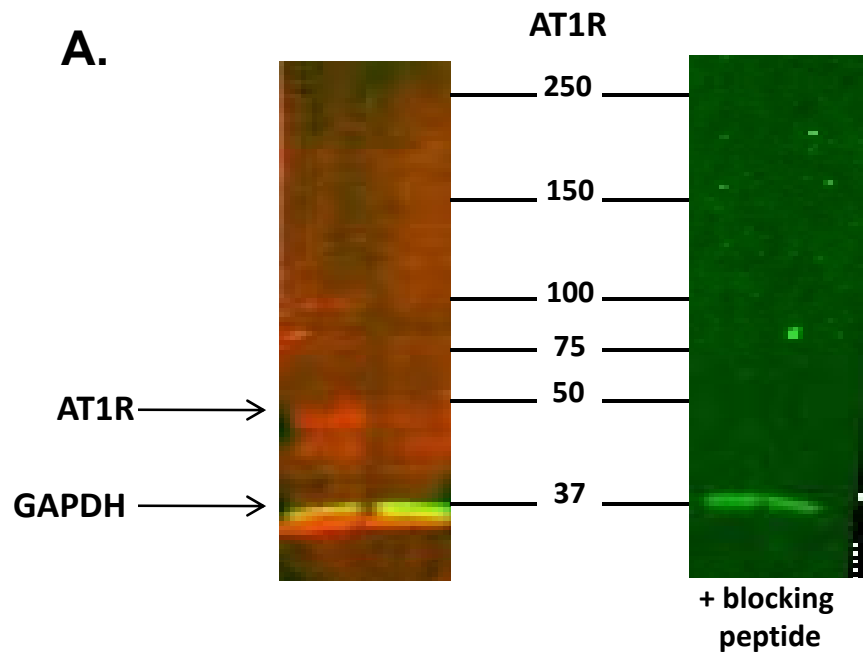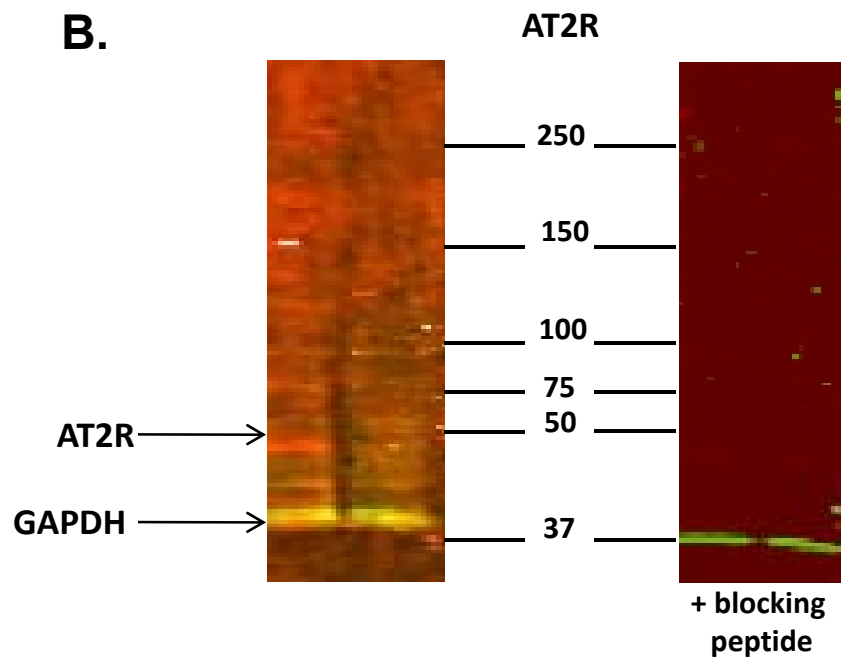

Supplement: supp_00088.2010_figS1.pdf [file supp_00088.2010_figS1.pdf]
